# Supplementary material for: When universal coverage is not enough: a mixed methods exploration of tuberculosis medication adherence in Bangkok
Source: Research Square preprint supplement (doi:10.21203/rs.3.rs-8525948/v1), 2026-02-07
Supplement: Supplementary file 1 [file a95cabca6c22002d55fd9d12.docx]

**Additional file 2. Semi-structured interview guide (English version)**

**Study context and administration notes**

Study: Factors influencing tuberculosis (TB) treatment access and medication adherence among patients receiving care at Lerdsin Hospital, Bangkok, Thailand.

Participants: Adult TB patients (≥18 years) receiving TB treatment at the TB clinic (Green Clinic).

Purpose: To explore how social structure, economic constraints, cultural beliefs, and perceptions shape access to TB services and treatment experiences.

- Recommended duration: 30–60 minutes; individual in-depth interview.
- Obtain informed consent and permission to audio-record before starting.
- Remind participants that they may skip any question or stop at any time without affecting their care.
- Interviews are conducted in Thai; this document is the English version provided for transparency (supplementary material).

**A. General characteristics (warm-up)**

1. Age
2. Sex
3. Marital status (single / married / divorced / widowed / separated)
4. Education: What is your highest level of education? (primary / secondary / bachelor’s / master’s / other)
5. Occupation
6. Monthly household income: Which range best describes your average household income per month?
7. Residence: Where do you live? (urban / suburban / other province)
8. Household size: How many people are in your household?
9. Perceived social status: How would you rate your social status? (low / middle / high)
10. Religion
11. Health insurance coverage (UCS/‘gold card’ / Social Security / Civil Servant Medical Benefit / private insurance / none)
12. Access to health services: Is it convenient for you to access health services? Please explain briefly.
13. Prior experiences with healthcare: Have you previously received care at hospitals/clinics? Please describe.
14. Travel to receive care: Is travelling to the facility convenient? Please explain.
15. Use of alternative medicine: Have you used any alternative/traditional treatments? If yes, what and why?

**B. Social structure (Social Structure)**

1. How does your occupation affect your access to TB treatment?
2. How does your social status (e.g., income, being known in the community) influence your decision to seek TB care?
3. How does your education and knowledge about TB affect your treatment?
4. Does your family relationship influence your decision to seek and continue TB treatment? How?
5. Do you receive support from your social networks (e.g., colleagues, friends, community leaders) for getting TB treatment? Please describe.
6. Does having health insurance make it easier for you to access TB treatment? How?

**C. Economic structure (Economic Structure)**

1. Does your household income influence your decision to seek and continue TB treatment? How?
2. How do treatment-related expenses (e.g., medicines, travel, after-hours fees, clinic/private hospital costs) affect your ability to receive TB care?
3. Have you ever faced financial problems that caused you to delay or cancel appointments/treatment? Please explain.
4. Does having (or not having) a regular job affect your treatment? How?
5. Do you feel that access to medical services is fair (equitable)? Why?
6. How easy or difficult is it for you to access the medicines or treatments you need?

**D. Cultural structure (Cultural Structure)**

1. Do your religious beliefs affect your decision to receive TB treatment? How?
2. What beliefs do you have about TB and its treatment?
3. Do you use any rituals, alternative remedies, or traditional medicine alongside biomedical treatment? Please describe.
4. How do your traditions or cultural practices influence your decision to receive treatment?
5. What beliefs do your family and community have about TB treatment?

**E. Perception (Perception)**

1. What is your attitude toward TB treatment?
2. Do you feel confident about the quality of the healthcare services you receive? Why?
3. What barriers do you think discourage patients from seeking treatment for TB?
4. Before you started treatment, how much did you know about TB and its treatment?
5. Do you think TB treatment is effective? Why or why not?

**F. Additional questions about access to treatment**

1. What problems have you experienced in accessing healthcare services?
2. Is travelling to receive care a problem for you? Please explain.
3. Have you ever been denied care or had a negative experience in the healthcare system? Please describe.
4. Do you have to wait a long time to receive care? How does this affect your treatment?
5. Is communication with healthcare personnel clear and easy to understand? Please explain.
6. What do you think should be improved in the healthcare service system for TB patients?
7. How well do you understand your healthcare entitlements/rights?
8. In your view, what is the single most important factor that helps patients access TB treatment effectively?
