# Supplementary material for: When universal coverage is not enough: a mixed methods exploration of tuberculosis medication adherence in Bangkok
Source: Research Square preprint supplement (doi:10.21203/rs.3.rs-8525948/v1), 2026-02-07
Supplement: Supplementary file 2 [file fb953e6241019453e56c2391.docx]

# Additional file 1. Structured questionnaire (English version)

Response format for Section B: 5-point Likert scale (1=Strongly disagree, 2=Disagree, 3=Neutral, 4=Agree, 5=Strongly agree).

## Section A. Demographic and clinical information

• Age (years)

• Sex

• Ethnicity / Nationality

• Marital status (if applicable)

• Occupation / Employment status

• Household income (monthly)

• Highest educational attainment

• Religion (if applicable)

• Healthcare coverage / entitlement scheme

• Caregiver / family support presence

• Comorbidities (yes/no; specify if yes)

• TB treatment phase (e.g., intensive/continuation, as per clinic record)

• Medication-taking behaviours (routine, reminders, etc.)

• Missed doses (yes/no; frequency)

• Transportation accessibility to the hospital / clinic

## Section B. Factors affecting anti-TB medication adherence (30 items)

Please indicate your level of agreement with each statement.

### Patient-related factors

1. I understand the importance of taking anti-TB medications regularly

2. I believe that taking medications will help me recover from TB

3. I understand the instructions and information on drug labels and from healthcare providers

4. I understand the symptoms and health impacts of TB

5. I understand that continuous medication is essential for recovery

6. I feel encouraged by support from colleagues and family for taking medications

7. I feel stigmatised or ashamed about receiving TB treatment

8. I feel the need to conceal my treatment from others or family

9. I receive support from family or caregivers in reminding me to take medications

10. I believe that my anti-TB medications are effective and safe

11. I have no problems taking medications as advised by healthcare providers

12. I feel that taking anti-TB medications improves my quality of life

### Medication-related factors

13. I received sufficient information about how to take medications and potential side effects

14. I can adapt my daily routine to accommodate medication schedules

15. I take medications exactly as prescribed without missing doses

16. I always remember to take medications at the designated times

17. I feel that taking anti-TB medications is not burdensome or complicated

18. I have not experienced any side effects from anti-TB medications

### Healthcare system factors

19. I can easily access health information services from the hospital when I have questions about medications

20. I receive continuous support and advice from healthcare providers

21. I trust the expertise of the physicians, pharmacists, and nurses caring for me

22. I find it convenient to collect medications each time

23. I am satisfied with the follow-up and care I receive from the hospital

24. My healthcare coverage adequately covers TB treatment

25. Travel distance and mode of transport affect my TB treatment attendance

26. Waiting time to see the doctor or collect medications affects my treatment

27. Administrative procedures (eligibility verification, chest X-ray, referral letters) affect my treatment

### Socioeconomic factors

28. TB treatment causes me to lose income-earning opportunities

29. I believe that loss of income or lack of money affects my TB treatment

### Condition-related factors

30. I have no health problems or conditions that hinder regular medication intake

End of questionnaire.
